## **Title: Single-cell transcriptomic profile reveals macrophage heterogeneity in medulloblastoma and their treatment-dependent recruitment**

Mai T. Dang<sup>1,2,8</sup>, Michael Gonzalez<sup>3</sup>, Krutika S. Gaonkar<sup>4,5,6</sup>, Komal S. Rathi<sup>4,5,6</sup>, Patricia Young<sup>8</sup>, Sherjeel Arif<sup>4,5,6</sup>, Li Zhai<sup>8</sup>, Md Zahidul Alam<sup>8</sup>, Samir Devalaraja<sup>2,8,9</sup>, Tsun Ki To<sup>2,8</sup>, Ian W. Folkert<sup>2,8,10</sup>, Pichai Ramen<sup>4,5,6</sup>, Jo Lynne Rokita<sup>4,5,6</sup>, Daniel Martinez<sup>11</sup>, Jaclyn N. Taroni<sup>7</sup>, Joshua Shapiro<sup>7</sup>, Casey S. Greene<sup>7, 12</sup>, Candace Savonen<sup>7</sup>, Hakon Hakonarson<sup>3,13</sup>, Tom Curran<sup>14</sup>, Malay Haldar<sup>2,8,9</sup>

<sup>1</sup>Division of Neurology, Children's Hospital of Philadelphia, Philadelphia, PA, USA

<sup>2</sup>Abramson Family Cancer Research Institute, Perelman School of Medicine, University of Pennsylvania, Philadelphia, PA, USA

<sup>3</sup>Center for Applied Genomics, Children's Hospital of Philadelphia, Philadelphia, PA, USA

<sup>4</sup>Center for Data-Driven Discovery in Biomedicine, Children's Hospital of Philadelphia, Philadelphia, PA, USA

<sup>5</sup>Department of Bioinformatics and Health Informatics, Children's Hospital of Philadelphia, Philadelphia, PA, USA

<sup>6</sup>Division of Neurosurgery, Children's Hospital of Philadelphia, Philadelphia, PA, USA

<sup>7</sup>Alex's Lemonade Stand Foundation for Childhood Cancer, Bala Cynwyd, PA, USA

<sup>8</sup>Department of Pathology and Laboratory Medicine, Perelman School of Medicine, University of Pennsylvania, Philadelphia, PA, USA

<sup>9</sup>Institute for Immunology, Perelman School of Medicine, University of Pennsylvania, Philadelphia, PA, USA

<sup>10</sup>Department of Surgery, Perelman School of Medicine, University of Pennsylvania, Philadelphia, PA, USA

<sup>11</sup>Pathology Core, Children's Hospital of Philadelphia, Philadelphia, PA, USA

<sup>12</sup>Department of Systems Pharmacology and Translational Therapeutics, Perelman School of Medicine, University of Pennsylvania, Philadelphia PA, USA

<sup>13</sup>Department of Pediatrics, Perelman School of Medicine, University of Pennsylvania, Philadelphia, PA 19104, USA

<sup>14</sup>Children's Research Institute at Mercy Children's Hospital, Kansas City, KA, USA

## 1 **Abstract**

2  
3 The role of macrophages in medulloblastoma, the most common malignant pediatric brain tumor, is  
4 unclear. Using single-cell RNA sequencing in a mouse model of sonic hedgehog medulloblastoma  
5 and analysis of bulk RNA sequencing of human medulloblastoma, we investigated macrophage  
6 heterogeneity. Our findings reveal differential recruitment of macrophages with molecular-targeted  
7 versus radiation therapy and identify an immunosuppressive monocyte-derived macrophages  
8 following radiation treatment of mouse medulloblastoma, uncovering potential strategies for  
9 immunomodulation as adjunctive therapy.

## 10 11 12 **Main Text**

13  
14 Macrophages in the brain tumor microenvironment are emerging as a predictor of clinical outcome<sup>1,2</sup>.  
15 However, targeting macrophages for immunotherapy, or indeed any immunotherapy, has yet to be  
16 proven effective for brain tumor treatment. A major barrier is our incomplete understanding of the  
17 heterogeneity of tumor-associated macrophages (TAMs) and how they respond to treatment. Within  
18 tumors, anti-inflammatory (M2-polarized) macrophages drive immunosuppression while pro-  
19 inflammatory (M1-polarized) macrophages support anti-tumor immunity. Macrophages in normal  
20 tissue are phenotypically, functionally, and ontologically heterogeneous. It is currently unclear  
21 whether tumor-associated macrophages display similar heterogeneity and if insights into the nature of  
22 their heterogeneity can inform their variable functions.

23  
24 Medulloblastoma (MB), one of the most common pediatric brain malignancies, is biologically  
25 heterogeneous comprising of four major molecular subgroups: WNT, sonic hedgehog (SHH), group 3,  
26 and group 4. Treatment includes surgical resection, chemotherapy, and radiation. Outcome is  
27 dependent on clinical-pathological features, patient age, and the presence of metastases.

28 Medulloblastomas are radiosensitive but radiation can lead to severe neurological side-effects which  
29 limits its use in young children. The SHH subtype dominates this early age group and is characterized  
30 by genetic alterations leading to constitutive activation of the SHH pathway. *PTCH1* is a negative  
31 regulator of SHH signaling that is mutated in a subset of human SHH-MB patients. Germline deletion  
32 of *Ptch1* in mice leads to MB with incomplete penetrance, but this increases to 100% penetrance  
33 when combined with loss of *Tp53*<sup>3</sup>. Importantly, *Tp53* loss in human SHH-MB is associated with poor  
34 prognosis<sup>4</sup>. Hence, *Ptch1*<sup>+/-</sup>:*Tp53*<sup>-/-</sup> mice are useful for studying high-risk SHH-MB. Inhibitors of the  
35 SHH pathway, such as GDC-0449 (Vismodegib<sup>TM</sup>), have shown remarkable efficacy in treating

36 murine SHH-MB and human patients in ongoing clinical trials<sup>5,6</sup>. However, development of therapeutic  
37 resistance to GDC-0449 remains a concern and GDC-0449 is contraindicated in young children  
38 because of its negative impact on bone growth<sup>7,8</sup>. Hence, novel therapies are vitally needed for  
39 patients in this high-risk group.

40  
41 Among the four different MB subtypes, SHH-MB harbors the most macrophages<sup>9</sup>. The vast majority  
42 of studies on macrophages in brain tumors are based on immunohistochemistry, flow cytometry, or  
43 transcriptional profiling of bulk tumor tissue, methods that have limited capacity to resolve cellular  
44 heterogeneity<sup>9-11</sup>. Single-cell RNA sequencing (scRNA-Seq) overcomes this limitation and has  
45 helped uncover TAM heterogeneity in other solid tumors. In a recent study, scRNA-Seq of human MB  
46 provided new insights into tumor heterogeneity but very few macrophages were captured, precluding  
47 detailed analyses of TAMs<sup>12</sup>. Furthermore, it remains unclear how these macrophages respond to  
48 standard treatment. In this study, we examine TAM composition in MB by performing scRNA-Seq of  
49 TAMs in *Ptch1*<sup>+/-</sup>: *Tp53*<sup>-/-</sup> mice and corresponding comparisons through the OpenPBTA project to  
50 estimate their contributions to bulk RNA-Seq measurements. Importantly, we identify unanticipated  
51 differences in the TAM composition in response to radiation and molecular-targeted therapy with  
52 GDC-0449, exposing potential strategies for immunomodulation as adjunctive therapy in MB.

53  
54 Consistent with previous reports, we find that SHH-MB contains significantly more macrophages than  
55 surrounding normal brainstem tissue (Figure 1a). To study macrophage heterogeneity, we performed  
56 scRNA sequencing (10X genomics) on CD11b<sup>+</sup> myeloid cells isolated from the following three types  
57 of samples from *Ptch1*<sup>+/-</sup>: *Tp53*<sup>-/-</sup> mice: 1) cerebella of 2-week old mice with minimal tumor to capture  
58 microglia in normal tissue, 2) peripheral blood of the same mice, 3) and cerebella of 8-week old mice  
59 harboring large tumors. Analysis across all three sample types revealed significant alteration in  
60 cerebellar macrophage composition in the presence of tumor (Figure 1b,c). Two large TAM clusters  
61 (collectively denoted TAM1 henceforth) aggregated closer to microglia while another three clusters  
62 (collectively denoted TAM2 henceforth) aggregated closer to monocytes, suggesting heterogeneous  
63 cell-of-origin for macrophages in MB (Figure 1d). Monocle-based analysis also supported microglia  
64 and monocyte origins for TAM1 and TAM2 respectively (Figure 1e).

65  
66 Previous studies have shown that only a few markers distinguish microglia from monocyte-derived  
67 macrophages in the brain and non-medulloblastoma high grade tumors<sup>1,10,13-15</sup>. Consistent with this,  
68 we find only a handful of markers (for example, *Siglech*, *Phgdh*, and *Pmp22*) that distinguished  
69 microglia in MB (Supplemental Figure 1a). Notably, we found expression of certain microglia-  
70 associated genes (for example, *Cd81*, *Fcrls*, *Olfml3*, *Sparc*, and *Tmem119*) in monocyte-derived

71 TAM2 (Supplementary Figure 1b), which likely reflects the impact of the brain microenvironment on  
72 monocyte-derived macrophages. Likewise, cross-expression of certain markers (for example, *Axl*,  
73 *Cst7*, *Cxcl16*, and *Ms4a7*) in both TAM1 and TAM2 may reflect the impact of tumor-microenvironment  
74 on macrophages (Supplementary Figure 1c). Certain canonical markers for monocytes such as *Ly6c2*  
75 and *Ccr2* were preserved in TAM2 and not present in TAM1 as expected (Supplement Figure1d).  
76 Additional monocyte-associated markers that were preserved in TAM2 includes *Plac8*, *Tgfbi*, *Iqgap1*,  
77 *Crip1*, *Vlm*, *Sirpb1c*, *S100a6*, *Plbd1*, and *Pla2g7*. Other markers such as *Mgst1* and *Chil3* were  
78 expressed in monocytes but lost in TAM2 (Supplement Figure1e). These findings will inform ongoing  
79 and future efforts to distinguish TAMs and resident brain macrophage subsets.

80  
81 We selected *Siglech* and *Clec12a* as specific markers of microglia- and monocyte-origins respectively  
82 for further validation in MB (Figure 1f). Given the vagaries of antibody-based detection, we used  
83 RNAscope™ *in situ* analysis, which confirmed expression of *Siglech* and *Clec12a* in the tumor  
84 microenvironment (Supplement Figure 2a,b). Both markers were only expressed in Iba1-positive cells  
85 in the tumor, confirming their specific expression in macrophages (Supplement Figure 2c,d). Dual  
86 staining showed mutually exclusive pattern of expression of these markers in tumor (Figure 1g).  
87 Examining TAM1 and TAM2 using ingenuity pathway analysis (IPA) showed enrichment of pathways  
88 associated with antigen presentation, interferon signaling, and activation of interferon regulated  
89 factors (IRF) downstream of cytosolic pattern-recognition receptors in TAM2 (Figure 1h).

90  
91 To examine the relevance of our findings in murine SHH-MB to human patients, we used  
92 deconvoluted bulk RNAseq data from 123 patients generated by the collaborative OpenPBTA project.  
93 MCP-counter analyses<sup>16</sup> of this dataset showed SHH subtype MB to be significantly enriched  
94 (amongst other MB subsets) for monocytes and macrophages, which is consistent with prior  
95 published IHC studies<sup>10</sup> (Figure 1i). Additional analysis using BRETIGEA<sup>17</sup> suggest that all subtypes  
96 of MB contain both microglia and monocyte-derived TAMs, albeit at varying proportions (Figure 1j,  
97 Supplementary Figure 3).

98  
99 There is a great deal of interest in the oncology community to characterize immune responses to  
100 traditional forms of treatment such as radiation, chemo, or molecular-targeted therapy. The  
101 overarching goal is to identify opportunities to combine these existing treatment modalities with  
102 emerging immunotherapeutic approaches. Therefore, we next investigated TAM responses to two  
103 distinct treatment modalities; SHH-pathway inhibitor (GDC-0449, twice daily doses of 100mg/kg for 4  
104 days) and radiation (3x10Gy). Radiation inducing a much greater macrophage recruitment (Figure  
105 2a). We performed scRNA-Seq on CD11b+ myeloid cells isolated from tumor-harboring cerebellum of

106 mice treated with each treatment modalities (Figure 2b,c). Using TAM1- and TAM2-associated  
107 markers identified above, we found significantly higher recruitment of monocyte-derived TAMs with  
108 radiation when compared to GDC-0449 (Figure 2d). We further validated this finding within tumors via  
109 RNAscope™ with *Siglech* and *Clec12a* probes (Figure 2e). Hence, molecular-targeted therapy with  
110 GDC-0449 and radiation therapy leads to recruitment of ontologically distinct subsets of  
111 macrophages.

112 Given the robust recruitment of TAM2 with treatment, we further analyzed this population with and  
113 without radiation. Clusters 3 and 5 within TAM2 showed higher expression of prototypical monocyte-  
114 associated genes *Ly6c2* and *Ccr2* (*Ly6c2/Ccr2<sup>hi</sup>*) when compared to clusters 0 and 4 (*Ly6c2/Ccr2<sup>lo</sup>*,  
115 Figure 2f). These latter clusters had higher expression of genes typically associated with microglia  
116 (*Tmem119*, *Fcrl2*, and *Olfml3*, Figure 2g). IPA-based comparison of these all four of these clusters  
117 showed adhesion and diapedesis activity as well as higher interferon signature in *Ly6c2/Ccr2<sup>hi</sup>* subset  
118 (Figure 2i) in comparison to the *Ly6c2/Ccr2<sup>lo</sup>*. Importantly, they also show enrichment of genes in the  
119 IL-10 pathway suggesting an immune suppressive phenotype. In contrast, *Ly6c2/Ccr2<sup>lo</sup>* show  
120 increased expression of complement and cathepsin genes, suggestive of higher phagocytic activity  
121 (Figure 2i). This may reflect a maturation spectrum where newly generated monocyte-derived  
122 macrophages may be more immune-suppressive and gradually turn on microglia associated genes in  
123 response to the brain microenvironment as they take on phagocytic functions that are characteristic of  
124 mature macrophages.

125  
126 To examine the function of monocyte-derived TAM2 in MB, we generated a monocyte-deficient SHH-  
127 MB model by breeding *Ptch1<sup>+/-</sup>: Tp53<sup>-/-</sup>* mice with *Ccr2* knockout (deficient in circulating monocytes)  
128 mice (Figure 3a). Henceforth, we refer to *Ptch1<sup>+/-</sup>: Tp53<sup>-/-</sup> Ccr2<sup>-/-</sup>* mice as Ccr2KO and *Ptch1<sup>+/-</sup>: Tp53<sup>-/-</sup>*  
129 mice as Ccr2WT. We performed scRNA-Seq on immune cells isolated from tumor-bearing  
130 cerebellum from Ccr2KO and Ccr2WT mice (Figure 3b-d). Monocyte deficiency was associated with  
131 altered myeloid cell recruitment post-radiation, including a significant reduction in *Clec12* positive  
132 TAMs (Supplement Figure 4), with a pronounced reduction in *Ly6c2/Ccr2<sup>hi</sup>* clusters (Figure 3e) in the  
133 Ccr2KO. This was also confirmed with flow cytometry (Figure 3f). Intriguingly, monocyte deficiency  
134 increased myeloid clusters 1 and 5, which expressed high levels of neutrophil markers such as  
135 *S100a9* and *Retlng* (Figure 3g). Consistent with this observation, we found significant accumulation of  
136 neutrophils (via Ly6G immunohistochemistry) within post-irradiated tumors of Ccr2KO compared to  
137 Ccr2WT tumors (Figure 3h).

139 The function of neutrophils in tumor is unclear and may themselves be heterogeneous, but neutrophil  
140 infiltration is commonly associated with inflammation, suggesting that the absence of TAM2 may lead  
141 to a more inflammatory milieu in radiation treated SHH-MB. Hence, we next asked whether loss of  
142 TAM2 with monocyte deficiency might also enhance frequency of intratumoral CD8 T cells. IHC with  
143 CD8+ antibody showed significantly higher levels of CD8T cells in post-irradiated tumors in Ccr2KO  
144 tumors compared to Ccr2WT (Figure 3i). These findings suggest that monocyte-derived TAM2 are  
145 immunosuppressive. To further assess this, we performed an *in vitro* T cell proliferation assay in  
146 which we co-cultured Ly6C<sup>hi</sup> cells from irradiated Ccr2WT animals with splenic T cells. Proliferation of  
147 CD8T cells were significantly inhibited in the presence of Ly6C<sup>hi</sup> cells, supporting their  
148 immunosuppressive nature (Figure 3j).

149  
150 Our work uncovers phenotypic and ontological heterogeneity within SHH-MB infiltrating TAMs and  
151 demonstrates distinct patterns of TAM recruitment with radiation versus molecular-targeted therapy.  
152 We find that radiation-induced monocyte derived TAMs are immunosuppressive and their absence  
153 engenders a pro-inflammatory tumor microenvironment marked by increased neutrophils and CD8+ T  
154 cells. T cell suppression by tumor-infiltrating macrophages is well-known, but the TAM interactions  
155 with neutrophils are less well understood. When compared to circulating neutrophils, we found that  
156 these tumor-associated neutrophils expressed higher levels of genes associated with communication  
157 between innate and adaptive immune system (Supplementary Figure 5). In this context, it is not  
158 entirely clear whether the increased influx of neutrophils in monocyte-deficient post-irradiated tumors  
159 are supportive or inhibitory to the tumor and/or anti-tumor immune responses and warrants further  
160 investigation. The increased frequency of CD8+ T cells suggests a potential benefit of combining  
161 immune checkpoint blockade (anti-PD1/PDL1) with monocyte depletion (Ccr2-targeting small  
162 molecule inhibitors or antibodies) in the setting of radiation therapy in MB. Given the desperate need  
163 for new treatment approaches, such evidence-based rational combination therapy may hold promise  
164 for brain tumors.

## 165 166 167 **Figure legends**

168  
169 **Figure 1. Dual origins of medulloblastoma-infiltrating macrophages.** (a) Immunohistochemistry  
170 of *Ptch1<sup>+/-</sup>:Tp53<sup>-/-</sup>* SHH-MB with Iba1 and F4/80 antibodies show tumor has a large accumulation of  
171 macrophages in comparison to brain stem. (b) Uniform Manifold Approximation and Projection  
172 (UMAP) display by sample type and by Seurat-based clusters (c) of cerebellar microglia and selected  
173 monocyte population from the peripheral blood of 2 week old *Ptch1<sup>+/-</sup>:Tp53<sup>-/-</sup>* mice (n=3) and TAMs

174 from cerebella of eight week old mice (n=2). (d) UMAP of select large clusters that we designate  
175 TAM1 for clusters more similar to microglia and TAM2 for those more similar to monocytes. (e)  
176 Monocle-based pseudotime analysis of the scRNA-Seq data show TAM1 being more similar to  
177 microglia and TAM2 to monocytes. (f) Violin plots displaying expression of genes known to be  
178 differentially expressed in ontologically distinct brain macrophages. Microglia-associated *Siglech* is  
179 highly expressed in TAM1 while monocyte-associated *Clec12a* is highly expressed in in TAM2. (g)  
180 RNA in situ hybridization (RNAscope™)-based detection of *Siglech* and *Clec12a* expression. The  
181 overwhelming majority of TAMs express one or the other marker, but not both. (h) IPA™ analyses of  
182 differentially expressed genes between TAM1 and TAM2. Overall, TAM2 displays higher  
183 'inflammatory signature' based on enrichment of pathways associated with: antigen presentation,  
184 interferon signaling, and activation of interferon-regulated factors induced by cytosolic pattern-  
185 recognition receptors. (i) MCP-counter-based analysis of cellular composition using bulk RNA-Seq of  
186 123 human pediatric medulloblastomas. SHH-MB show higher infiltration with lymphocytes and  
187 myeloid cells compared to other MB subtypes. (j) BRETIGEA cell proportion analysis of  
188 aforementioned human medulloblastoma RNA-Seq data show the co-existence of both microglia  
189 (Mic) and monocytes (Mono) in human MB. OPC = oligodendrocyte precursor cells, Oli =  
190 oligodendrocytes, Mic = microglia, End = endothelial cells, Ast = astrocytes, Mono = monocytes, Neu  
191 = neurons.

192  
193 **Figure 2. Radiation induces selective recruitment of monocyte-derived macrophages**

194 **compared to molecular-targeted treatment in SHH-MB.** (a) Both GDC-0449 and radiation recruits  
195 macrophages within SHH-MB with the latter displaying significantly greater recruitment. (b-c) UMAP  
196 display of aggregated data of GDC-0449 treated (n=2) and radiation treated tumors (n=2) with  
197 Seurat-based clustering show differential recruitment of TAM populations as determined by their  
198 expression of aforementioned markers for microglia and monocyte-derived TAMs, including *Siglech*  
199 and *Clec12a* (d). (e) RNA-Scope™ analyses of tumor tissue is consistent with scRNA-Seq, showing  
200 higher accumulation of *Clec12a*-expressing TAMs with radiation therapy. (f) UMAP display of scRNA-  
201 Seq comparing untreated tumors to radiation treated tumors with Seurat-based clustering (labeled by  
202 numbers). Radiation induces accumulation of TAMs expressing monocyte-markers *Ly6c2* and *Ccr2*.  
203 (g) Among the four largest monocyte-derived clusters that showed highest increase post-radiation,  
204 clusters 0 and 4 have less *Ly6c2* and *Ccr2* (*Lyc2/Ccr2*<sup>lo</sup>, genes associated with monocytes)  
205 expression and higher expression of microglia-associated markers such as *Olfml3*, *Fcrls*, and  
206 *Tmem119*. (h) IPA of these four clusters in irradiated samples shows *Lyc2/Ccr2*<sup>hi</sup> clusters (clusters 3  
207 and 5) have higher expression of interferon signaling genes and granulocyte adhesion/ diapedesis

genes, while *Lyc2/Ccr2*<sup>lo</sup> clusters have higher expression of markers for phagocytosis. \*\*  $p = <0.01$ ,  
\*\*\*  $p = <0.0001$

**Figure 3. Reducing monocyte-derived macrophages engenders inflammatory signature in radiation-treated SHH-MB.** (a) *Ptch1*<sup>+/-</sup>:*Tp53*<sup>-/-</sup> (*Ccr2*WT) and *Ccr2*<sup>-/-</sup> mice were bred to produce *Ptch1*<sup>+/-</sup>:*Tp53*<sup>-/-</sup>:*Ccr2*<sup>-/-</sup> mice (*Ccr2*KO). (b) Aggregated analysis scRNA-Seq from irradiated SHH-MB harboring cerebellum from *Ccr2*WT (n=3, blue) and *Ccr2*KO (n=3, red) mice, grouped by genotype of *Ccr2*WT and *Ccr2*KO. Two *Ccr2*KO samples and one *Ccr2*WT sample contained cells enriched by CD45<sup>+</sup> selection and the remainder were of Cd11b<sup>+</sup> enriched cells. Subsets of just *Ccr2*WT (c) and *Ccr2*KO (d) cells show differential recruitment of distinct myeloid populations. Seurat-based clusters are labeled as numbers. (e) *Ly6c2/Ccr2*<sup>hi</sup> subpopulations (highlighted) are significantly reduced in post-radiation *Ccr2*KO tumors compared to *Ccr2*WT. (f) Flow cytometry confirms the reduction of *Ly6c*<sup>hi</sup> cells in *Ccr2*KO. (g) Largest myeloid subpopulation selectively recruited in *Ccr2*KO tumors have signature of neutrophils (*S100a9*, *Retnlg*). (h) Immunohistochemistry staining with Ly6G antibody shows irradiated *Ccr2*KO have a significantly higher accumulation of neutrophils. (i) Staining with CD8<sup>+</sup> antibody shows they also have an increased accumulation of cytotoxic CD8<sup>+</sup> T cells. (j) T cell proliferation assay shows *Ly6c*<sup>hi</sup> TAMs from irradiated *Ccr2*WT tumors suppress proliferation of CD3/CD28 stimulated splenic CD8<sup>+</sup> cells. \*\*  $p < 0.01$

**Supplementary Figure 1. scRNA-Seq identifies markers for TAM subtypes and origin.** (a) Microglia-specific genes that are higher in TAM1 compared to TAM2. (b) Microglia-specific genes that are expressed in both TAM1 and TAM2, highlighting the influence of the brain microenvironment. (c) Genes selectively expressed in TAMs but not in the cell of origin, highlighting the influence of tumor microenvironment. (d) Monocyte-specific genes expressed in TAM2 but not TAM1. (e) Monocyte-associated genes that are not expressed in TAM2.

**Supplementary Figure 2. Specificity of *Siglech* and *Clec12a* in tissue.** (a) *Siglech* is expressed in microglia of the brainstem (arrow points to probe positive cells) while *Clec12a* (b) does not (c). (d) *Siglech* and *Clec12a* are only expressed by Ibal<sup>+</sup> cells.

**Supplementary Figure 3. Cell proportion of microglia and monocyte in tumor tissue in the 4 subtypes of human medulloblastoma.** BRETIGEA analysis of deconvoluted bulk RNAseq human medulloblastomas show varying relative proportions of microglia versus monocyte-like macrophages within subtypes. Macrophages with microglia signature are more abundant in SHH (Wilcoxon  $p =$



242 0.026, n=48) and WNT (Wilcoxon  $p = 0.022$ , n=20) subtypes, while macrophages with monocyte  
243 markers are higher in Group 4 (Wilcoxon  $p = 1.6e-5$ , n=116).

244  
245 **Supplementary Figure 4. Expression of Clec12a expression in irradiated tissue.** a) scRNA-Seq  
246 data of Ccr2WT and Ccr2KO samples post-radiation show *Clec12a* expressing TAMs are significantly  
247 reduced in post-irradiated Ccr2KO tumors compared to Ccr2WT. b) RNAscope<sup>TM</sup> using probes for  
248 Siglech (brown) versus Clec12a (red) show relatively less Clec12a expressing cells than in Ccr2WT  
249 shown in Figure 2f.

250  
251 **Supplementary Figure 5. IPA identifies increase expression of genes associated with innate  
252 and adaptive immune interaction.** (a) UMAP showing S100a9 expressing neutrophils from  
253 peripheral Cd11b+ sample and (b) from irradiated Ccr2KO mice. (c) IPA shows increased expression  
254 of cytokines and MHC-associate genes, suggesting potential interactions with adaptive immune cells  
255 in post-irradiated MB-associated neutrophils compared to circulating neutrophils.

## 256 **Material and methods**

### 257 **Animals**

258 Three genetically engineered models purchased from Jackson Laboratory were used: Ptch<sup>+/-</sup> (stock  
259 no. 003081), Tp53<sup>-/-</sup> (stock no. 002101), Ccr2<sup>-/-</sup> (004999). Ptch1<sup>+/-</sup>:Tp53<sup>-/-</sup> mice were bred and Ccr2<sup>-/-</sup>  
260 genotyping was performed as previously reported<sup>3,18</sup>. Both males and females of both Ptch1<sup>+/-</sup>:Tp53<sup>-/-</sup>  
261 and Ptch1<sup>+/-</sup>:Tp53<sup>-/-</sup>:Ccr2<sup>-/-</sup> were used for this study. Mice were bred and maintained in specific  
262 pathogen free facilities at the University of Pennsylvania. Mice were group-housed (21°C; 12h:12h  
263 light:dark cycle) and given *ad libitum* access to standard rodent diet. All animal procedures were  
264 conducted according to National Institutes of Health guidelines and approved by the Institutional  
265 Animal Care and Use Committee at the University of Pennsylvania.  
266

### 267 **Tumor treatment modalities**

268 Mice were treated with SMO inhibitor, GDC-0449 (Chemitec, suspended in 0.5% methylcellulose and  
269 0.2% Tween 80) at a dose of 100mg/kg twice a day for 4 days. Brains were resected and analyzed 12  
270 hours after the 8<sup>th</sup> dose. Radiation treatment was completed on a Small Animal Radiation Research  
271 Platform that delivers photon radiation with CT-guided location. Mice that were used for scRNA-Seq  
272 received 3 doses of 10Gy radiation on consecutive days. Whole brain were resected for TAM  
273 isolation 5 days after the last dose of radiation. Tissues from irradiated mice for all other experiments  
274 received 1 dose of 10Gy radiation and tissues were analyzed 3 or 4 days after radiation.  
275

276 For radiation treatment, mice were anesthetized with 2% isoflurane in a carrier gas of medical grade  
277 air utilizing an induction chamber connected to anesthesia machine (Matrx). Once the mouse reached  
278 the desired plane of anesthesia (~2 minutes), the animal was placed on the SARRP's (Xstrahl Life  
279 Sciences) irradiation platform with the nose of the mouse in a nosecone where flow of administered  
280 isoflurane (maintained at 2%) was remotely controlled using Somnosuite (Kent Scientific) anesthesia  
281 system. The mouse tumor was targeted manually with the help of onboard positioning lasers of the  
282 SARRP. 10 Gy doses were delivered using 10 mm diameter collimated beam of X-rays with tube  
283 potential of 220kVp, 13mA current and dose rate of ~2Gy/min.  
284

### 285 **scRNA-Sequencing and analysis**

286 Whole cerebellar tissue were mechanically homogenized in RPMI medium. Immune cells were  
287 purified using a 70/30 Percoll (Sigma Aldrich, 17-0891-02) gradient spun for 30 minutes at 500G.  
288 Cells at the interface were collected and further purified with CD11b<sup>+</sup> magnetic microbeads (Miltenyi  
289 Biotec, 130-092-636) or CD45 beads (Miltenyi Biotec, 130-052-301 ) through two consecutive LS  
290

291 columns (Miltenyi Biotec, 130-042-401). Peripheral blood was collected in heparinized tubes and  
292 spun down to collect cellular components. Red blood cells were lysed (ACK lysing buffer). Remaining  
293 lymphocytes were isolated with CD11b+ magnetic beads.

294  
295 Next-generation sequencing libraries and sequencing were conducted at the Center for Applied  
296 Genomics Core at the Children's Hospital of Philadelphia. Libraries were prepared using the 10x  
297 Genomics Chromium Single Cell 3' Reagent kit v2 per manufacturer's instructions. Libraries were  
298 uniquely indexed using the Chromium i7 Sample Index Kit, pooled, and sequenced on an Illumina  
299 HiSeq sequencer in a paired-end, single indexing run. Sequencing for each library targeted 20,000  
300 mean reads per cell. Data was processed using the Cellranger pipeline (10x genomics, v.3.0.2) for  
301 demultiplexing and alignment of sequencing reads to the mm10 transcriptome and creation of  
302 feature-barcode matrices. Individual single cell RNAseq libraries were aggregated using the  
303 cellranger aggr pipeline. Libraries were normalized for sequencing depth across all libraries during  
304 aggregation. Secondary analysis on the aggregated feature barcode matrices was performed using  
305 the Seurat package (v.3.0) within the R computing environment. Briefly, cells expressing less than  
306 200 or more than 4000 genes were excluded from further analysis. Additionally, cells expressing  
307 greater than 10% mitochondrial genes were excluded from the dataset. Batch correction was  
308 performed using a comprehensive integration algorithm<sup>19</sup>. Log normalization and scaling of features  
309 in the dataset was performed prior to principal component dimensionality reduction, clustering, and  
310 visualization using UMAP. Generally 15 PCAs were used in each analysis and resolution was set at  
311 0.6. Differentially expressed genes and identification of cluster or cell type specific markers were  
312 identified using a Wilcoxon rank sum test between each defined group. P-value adjustment was  
313 performed using Bonferroni correction based on total number of genes in the aggregated  
314 dataset. The monocle library in R was used to determine pseudotime trajectories in separate cell  
315 subpopulations. Analysis of differential genes between clusters were performed using Ingenuity  
316 Pathway Analysis software.

### 317 318 **RNAseq analysis of human tumors**

319 Collapsed RNA-Seq data from 123 human medulloblastoma tissues were obtained through data  
320 release V13 of the OpenPBTA project ([github.com/AlexsLemonade/OpenPBTA-analysis](https://github.com/AlexsLemonade/OpenPBTA-analysis)), a global  
321 open science collaborative efforts of the Children's Brain Tumor Tissue Consortium, Pediatric Neuro-  
322 oncology Consortium, Alex's Lemonade Stand Foundation's Childhood Cancer Data Lab, and the  
323 Center for Data-Driven Discovery in Biomedicine at the Children's Hospital of Philadelphia.

325 Microenvironment Cell Populations-counter (MCP-Counter) method from the R package  
326 `immunedecon`<sup>16</sup> was used to deconvolute the tumor microenvironment of 123 human  
327 medulloblastoma RNA-Seq samples consisting of four molecular subtypes i.e. Group3 (n = 15), WNT  
328 (n = 11), Group4 (n = 67) and SHH (n = 31). MCP-Counter represents cell type enrichment as  
329 abundance scores that are correlated to actual cell type proportions. To visualize the subtype specific  
330 enrichment, we created a heatmap of average immune scores per cell type across each molecular  
331 subtype (Code availability: [https://github.com/d3b-center/Dang\\_MB\\_2020](https://github.com/d3b-center/Dang_MB_2020)).

332  
333 BRETIGEA<sup>17</sup> method (<https://github.com/andymckenzie/BRETIGEA>) was used to find surrogate  
334 proportion variables (SPV) of brain cells astrocytes (ast), endothelial cells (end) , microglia (mic) ,  
335 neurons (neu) , oligodendrocytes (oli) , and oligodendrocyte precursor cells (opc), derived from each  
336 of human, mice, and combination human/mouse data sets. In addition to that, we added monocyte  
337 marker genes from prior published work<sup>14</sup> and monocyte marker genes from xCell<sup>20</sup> to  
338 calculate surrogate proportion variables for monocyte cell types in brain samples. The results should  
339 be considered as preliminary data which needs further validation by correlating SPV to true monocyte  
340 cell proportions in control datasets. We ran function `findCells()` using SVD method to calculate SPVs  
341 and all 1000 marker genes for brain cell types provided in BRETIGEA package along with 317 genes  
342 for monocyte. All cell type SPVs were then plotted for each sample as stacked bar plots.

## 343 344 **Immunohistochemistry**

345 Whole mouse brain tissues were fixed in 4% formaldehyde for 7 days and standard paraffinization  
346 was performed. Sections were cut to 5 um thickness. Sections were rehydrated in xylene and serial  
347 ethanol concentrations. Antigen retrieval was achieved with sodium citrate buffer (ph7 or 9) in a  
348 pressure cooker. Sections were incubated overnight at 4°C with primary antibody. Anti-mouse  
349 primary antibodies used include the following: Ibal (Wako Chemicals, 019-19741), F4/80 (Life  
350 Technologies, MF48000), CD8 (Abcam, ab203035), and Ly6G (StemCell Technologies 60031).  
351 Tissues were then incubated with secondary anti-rabbit biotinylated (Vector Labs, BA-1000) or anti-  
352 rat biotinylated secondary antibody (Vector Labs, BA-4001) for 30 minutes at room temperature.  
353 Signal was amplified with avidin/biotin ABC complex (Vector Labs, PK-6102) and stained with DAB  
354 substrate chromogen (DAKO, 2016–10). NIS Elements BR 3.0 software was used to capture and  
355 analyze the images. Quantification of positive CD8, F4/80 or Ly6G cells were done in ImageScope.  
356 Counts are averages of 3 animal per treatment group. 3 sections spaced at least 100 microns apart  
357 were averaged for each animal.

## 358 359 **RNA in situ hybridization**

360 For Chromogenic InSitu Hybridization (CISH) staining fresh slides were section, air dried, and baked  
361 within 48hrs of staining. Staining was performed on a Bond RXm automated staining system (Leica  
362 Biosystems). For dual CISH probe staining Mm-Siglec and Mm-Clec12a probes (Advanced Cell  
363 Diagnostics, 528248/514358-C2) were used along with the RNAscope 2.5 LS Duplex Reagent Kit  
364 (Advanced Cell Diagnostics, 32240). Standardized protocols from Advanced Cell Diagnostics were  
365 used without modifications. For dual CISH + IHC Mm-Siglec or Mm-Clec12a probes (Advanced Cell  
366 Diagnostics 528248/514358) were used along with Iba 1 antibody (Wako 019-19741) at a 1:1K  
367 dilution with no additional retrieval steps. For the IHC portion a Bond Refine staining kit (Leica  
368 Biosystems, DS9800) was used with a standard protocol minus the peroxide blocking step which was  
369 deleted. After staining slides were air dried, coverslipped, and scanned at 40x magnification with an  
370 Aperio CS-O slide scanner (Leica Biosystems).

### 372 **Flow cytometry**

373 Whole cerebellar tissue were minced and cells were dissociated with collagenase B and DNase I for  
374 45 minutes at 37C and filtered through 70uM cell strainer. Samples were incubated for 10 minutes  
375 with CD16/32 Fc Block (BD Biosciences, 553142) and stained on ice with primary-fluorophore  
376 conjugated antibodies for identification of cell populations by FACS. Flow cytometry was performed on  
377 an LSR II Flow Cytometer (BD Biosciences) and analyzed using FlowJo software (Treestar).  
378 Antibodies used include the following: CD45 (BioLegend, clone 30-F11), CD11b (BioLegend, clone  
379 CBRM1/5), Ly6C (BioLegend, clone HK1.4), Ly6G (BioLegend, 1A8), CD8 (BioLegend, 53.6.7), CD3  
380 (BioLegend, 17A2).

### 382 **T cell suppression assay**

383 Mouse splenic T cells were isolated from Ptch1<sup>+/-</sup>:Tp53<sup>-/-</sup> mice using Pan T cell isolation Kit (Miltenyi  
384 Biotec). 4 x 10<sup>4</sup> mouse T cells were labeled with CFSE (Life Technologies, C34554) and cultured for  
385 3 days at 37C with 1ul of  $\alpha$ CD3/28 bead (Thermo Fisher Scientific, 11131D) and 15U recombinant  
386 human IL-2 (Peprotech, Inc. 200-02). CD45<sup>+</sup>, Ly6Chi cells isolated from tumors post-radiation were  
387 sorted on MoFlo Astrios at the Children's Hospital of Philadelphia Flow Cytometry Core Laboratories.  
388 T cell proliferation was determined by measuring CFSE signal in CD45<sup>+</sup>CD3<sup>+</sup>CD8<sup>+</sup> cells.

### 390 **Statistical analysis**

391 Statistical analyses of data were carried out using the unpaired two-tailed Student's t-test for  
392 comparison between two experimental groups. Wilcoxon signed-rank test was used in the BRETIGEA  
393 human data analysis.

## **References**

1. Müller, S. *et al.* Single-cell profiling of human gliomas reveals macrophage ontogeny as a basis for regional differences in macrophage activation in the tumor microenvironment. *Genome Biol.* **18**, 234 (2017).
2. Lee, C. *et al.* M1 macrophage recruitment correlates with worse outcome in SHH Medulloblastomas. *BMC Cancer* **18**, 535 (2018).
3. Wetmore, C., Eberhart, D. E. & Curran, T. Loss of p53 but not ARF accelerates medulloblastoma in mice heterozygous for patched. *Cancer Res.* **61**, 513–516 (2001).
4. Zhukova, N. *et al.* Subgroup-specific prognostic implications of TP53 mutation in medulloblastoma. *J. Clin. Oncol.* **31**, 2927–2935 (2013).
5. Romer, J. T. *et al.* Suppression of the Shh pathway using a small molecule inhibitor eliminates medulloblastoma in Ptc1(+/-)p53(-/-) mice. *Cancer Cell* **6**, 229–240 (2004).
6. Robinson, G. W. *et al.* Vismodegib Exerts Targeted Efficacy Against Recurrent Sonic Hedgehog-Subgroup Medulloblastoma: Results From Phase II Pediatric Brain Tumor Consortium Studies PBTC-025B and PBTC-032. *J. Clin. Oncol.* **33**, 2646–2654 (2015).
7. Dijkgraaf, G. J. P. *et al.* Small molecule inhibition of GDC-0449 refractory smoothed mutants and downstream mechanisms of drug resistance. *Cancer Res.* **71**, 435–444 (2011).
8. Gajjar, A. *et al.* Phase I study of vismodegib in children with recurrent or refractory medulloblastoma: a pediatric brain tumor consortium study. *Clin. Cancer Res.* **19**, 6305–6312 (2013).
9. Margol, A. S. *et al.* Tumor-associated macrophages in SHH subgroup of medulloblastomas. *Clin. Cancer Res.* **21**, 1457–1465 (2015).
10. Bowman, R. L. *et al.* Macrophage Ontogeny Underlies Differences in Tumor-Specific Education in Brain Malignancies. *Cell Rep* **17**, 2445–2459 (2016).
11. Chen, Z. *et al.* Cellular and Molecular Identity of Tumor-Associated Macrophages in Glioblastoma. *Cancer Res.* **77**, 2266–2278 (2017).

12. Hovestadt, V. *et al.* Resolving medulloblastoma cellular architecture by single-cell genomics. *Nature* **572**, 74–79 (2019).
13. Bennett, F. C. *et al.* A Combination of Ontogeny and CNS Environment Establishes Microglial Identity. *Neuron* **98**, 1170-1183.e8 (2018).
14. Haage, V. *et al.* Comprehensive gene expression meta-analysis identifies signature genes that distinguish microglia from peripheral monocytes/macrophages in health and glioma. *Acta Neuropathol Commun* **7**, 20 (2019).
15. Melcher, V. *et al.* Macrophage-tumor cell interaction promotes ATRT progression and chemoresistance. *Acta Neuropathol.* (2019) doi:10.1007/s00401-019-02116-7.
16. Becht, E. *et al.* Estimating the population abundance of tissue-infiltrating immune and stromal cell populations using gene expression. *Genome Biol.* **17**, 218 (2016).
17. McKenzie, A. T. *et al.* Brain Cell Type Specific Gene Expression and Co-expression Network Architectures. *Sci Rep* **8**, 8868 (2018).
18. Boring, L. *et al.* Impaired monocyte migration and reduced type 1 (Th1) cytokine responses in C-C chemokine receptor 2 knockout mice. *J. Clin. Invest.* **100**, 2552–2561 (1997).
19. Stuart, T. *et al.* Comprehensive Integration of Single-Cell Data. *Cell* **177**, 1888-1902.e21 (2019).
20. Aran, D., Hu, Z. & Butte, A. J. xCell: digitally portraying the tissue cellular heterogeneity landscape. *Genome Biol.* **18**, 220 (2017).

Figure 1

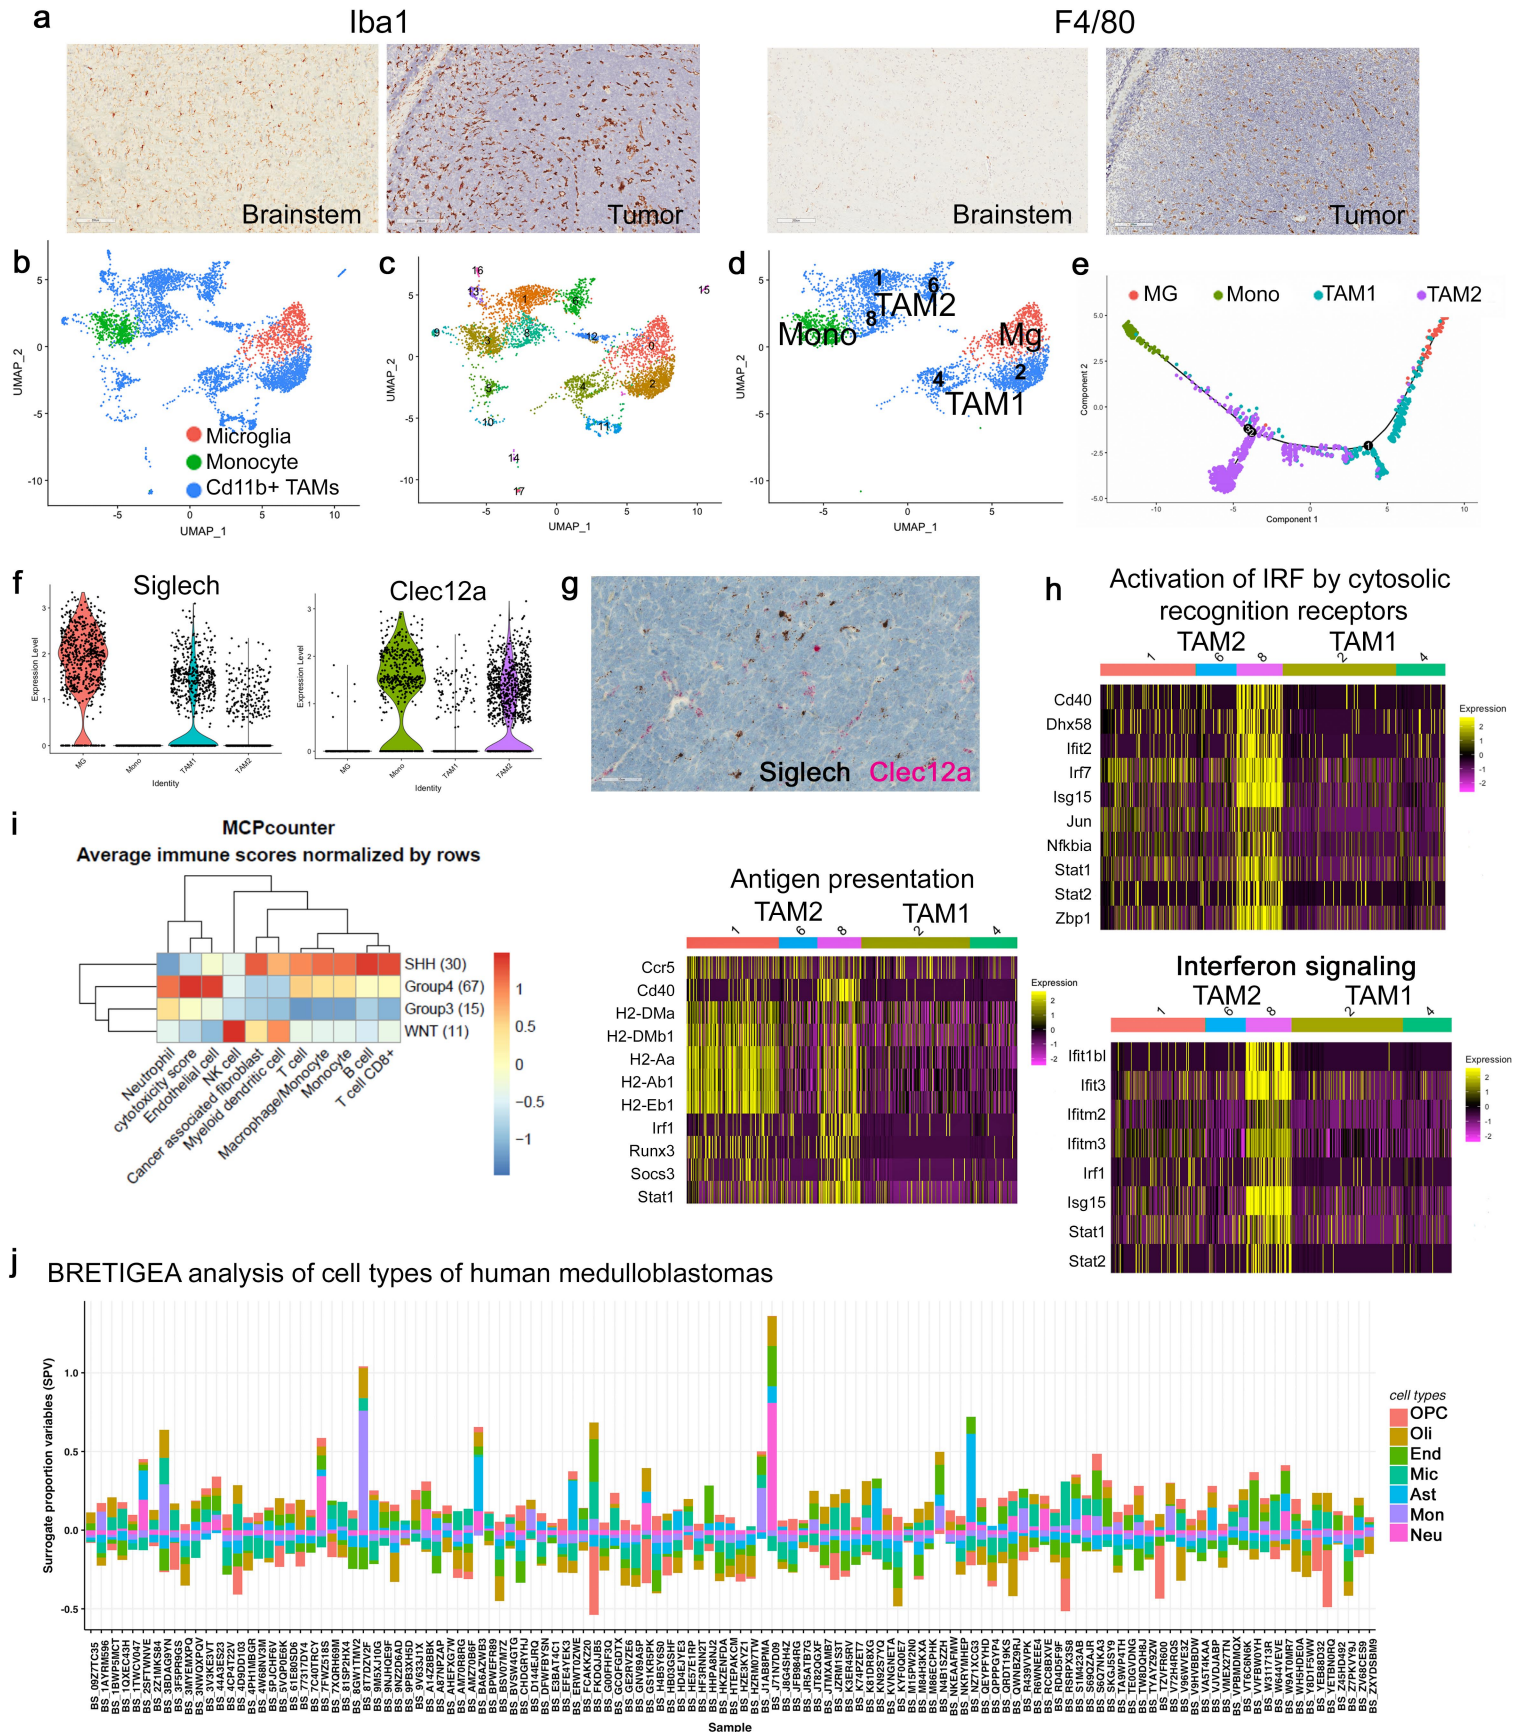



Figure 2

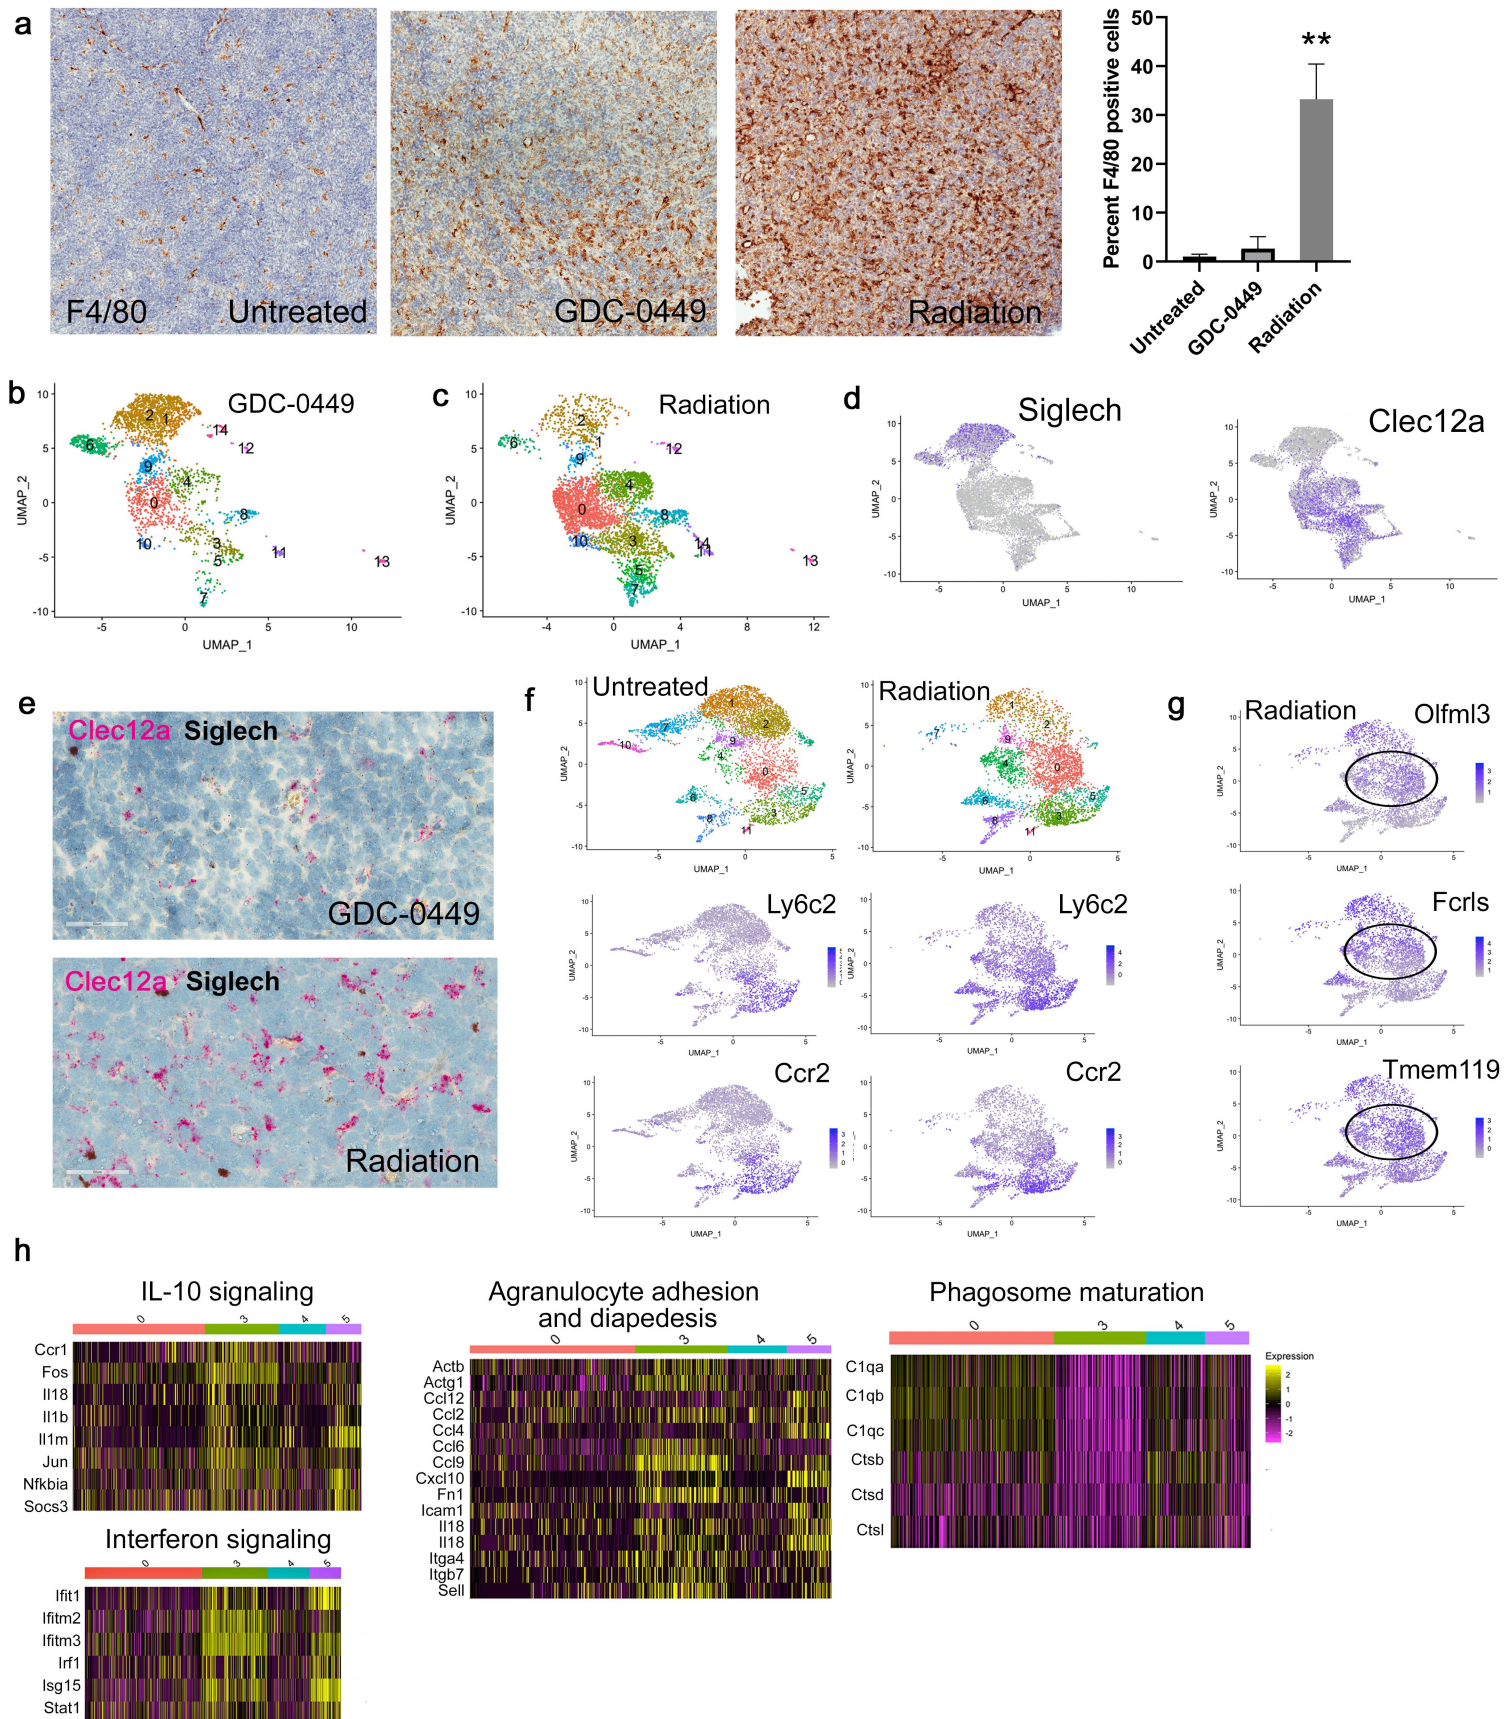

Figure 3

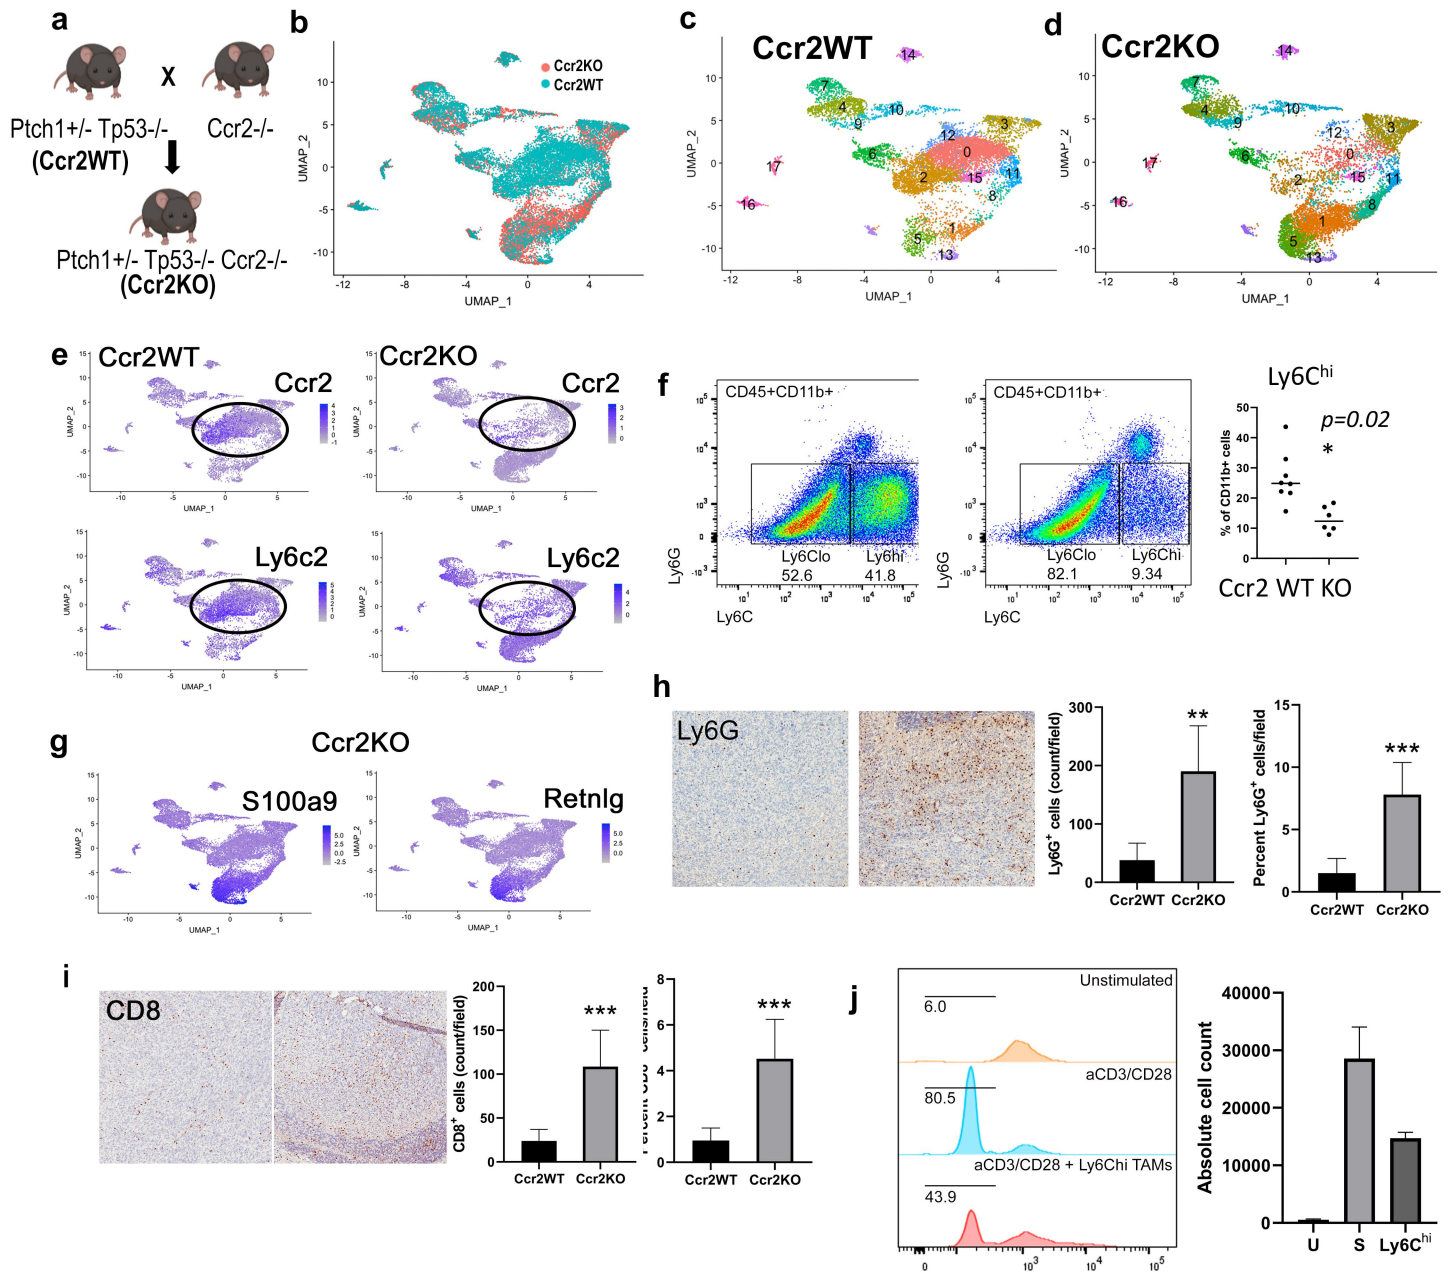

Source: https://biorxiv.org/content/biorxiv/early/2020/02/13/2020.02.12.945642.full-text.pdf
